# Supplementary material for: A cellular mechanism for inverse effectiveness in multisensory integration
Source: eLife. 2017 Mar 18;6:e25392. doi: 10.7554/eLife.25392 (PMC5375642; doi:10.7554/eLife.25392)
Supplement: Figure 1—source data 1. — Excel table contains raw data points used to generate figure, organized by panel. DOI: http://dx.doi.org/10.7554/eLife.25392.003 [file elife-25392-fig1-data1.xlsx]

## Sheet: figure 1
Panel B									Panel C					Panel F
0% contrast		25% contrast		50% contrast		100% contrast			0% contrast	25% contrast	50% contrast	100% contrast		Max unisensory response	Multisensory enhancement
visual	multisensory	visual	multisensory	visual	multisensory	visual	multisensory		-0.07434	1.46704	-0.23356	3.16789		0.13596	0.583964
1.41541	1.31019	1.47493	3.12508	2.76379	2.11828	0.755682	3.1496		-0.24414	-0.35669	3.13977	-0.22454		0.0396353	2.62989
2.48852	1.88099	3.44665	2.35424	0.906431	3.75242	4.59217	3.03893		-0.10202	0.070449	1.55945	-0.65989		2.05824	0.0993125
5.37688	4.82832	4.73996	9.40295	5.20278	6.91871	13.0559	4.64503		0.089891	-0.03331	0.003545	-0.13059		0.061923	3.12537
0.627325	0.806305	0.454276	0.102241	0.830033	0.09864	0.767425	0.085335		0.13623	1.44672	0.223482	0.699852		0.135974	0.118955
4.07895	5.5431	4.79783	4.63802	7.23304	7.25868	6.84599	5.952		-0.08915	-0.02324	-0.14466	-0.50023		0.323449	0.274535
2.90552	3.4192	1.21606	3.76968	3.42747	4.19345	4.84833	8.24144		0.360886	-0.20239	-0.04991	0.883064		0.0213468	8.9621
1.73997	2.70138	3.37884	2.85082	3.12936	2.67667	3.64039	1.81936		0.657108	2.29418	0.318924	0.000363		0.135634	1.18867
1.7742	2.41448	0.683468	0.658674	1.41134	1.49341	2.2679	5.32639		-0.17856	-0.78586	-0.44521	-0.00733		0.957456	-0.0593318
1.39784	2.31638	0.900076	2.40301	1.75301	2.31208	2.01943	2.02016		-0.33898	-0.28078	1.06171	-0.29673		0.183148	0.26071
3.24031	2.66171	3.56081	1.11905	1.84001	0.714879	3.29908	3.27488		-0.39679	-0.42173	0.368257	-0.70737		0.437808	0.576146
1.05751	0.699032	1.64722	1.85634	0.977092	2.01448	3.24454	2.31062		-0.03434	3.02275	4.70441	1.78068		0.0610148	1.96188
5.38555	3.24861	3.31894	1.91924	2.59869	3.55567	7.01275	2.05214		-0.38698	-0.10369	1.86014	0.32749		0.109063	0.560159
3.44634	3.32798	1.05038	4.1629	1.4565	10.3201	3.08053	7.23829		0.592991	1.421	1.30041	-0.6803		0.0335012	4.81265
4.81247	2.95012	3.80498	4.02264	2.02892	5.803	2.87617	4.73695		-0.01395	0.738906	-0.52878	-0.26945		0.11796	0.214816
1.76564	2.81265	1.5835	3.83366	1.2694	2.52221	10.8188	3.45879		-0.29623	-0.26464	0.245652	-0.12032		0.104557	0.796393
2.50435	3.68074	2.94885	5.59373	5.59548	2.63668	4.34683	3.17558		-0.24218	4.87223	-0.8668	-0.22601		0.110857	0.406685
2.38047	1.67531	2.85627	2.10038	2.09962	2.91204	2.56579	2.25707		0.466854	1.24887	5.29699	-0.80813		0.123109	0.79677
2.36164	1.7897	1.78177	11.7671	15.2327	2.02897	2.50379	1.9379		0.101175	2.77269	-0.27538	1.67547		0.256103	1.11902
2.97689	3.507	3.79518	6.40035	1.15132	5.75824	6.5007	0.820717		-0.31558	0.016571	-0.63686	-0.00758		0.281044	0.306738
5.83706	6.41324	1.75876	8.23964	1.6395	1.33822	2.48685	6.65347		0.119679	2.81984	-0.4058	-0.01393		0.108112	1.00811
1.76663	1.97805	1.20995	4.62181	4.30271	2.55668	2.48348	2.4489		-0.12108	-0.60607	0.559279	2.6767		0.114402	0.225821
2.46289	2.16467	6.13157	2.41541	3.26562	5.09201	1.44732	5.32135		-0.15103	-0.51677	-0.18607	0.662021		2.05081	0.224427
2.91893	2.47809	4.04035	1.95242	3.35639	2.73187	3.79547	6.30815		-0.2144	1.18925	1.59591	-0.28151		0.313169	0.541282
2.99481	2.73771	1.88586	4.12862	1.17189	3.02927	4.70848	2.89009		0.162894	-0.48198	0.385964	-0.36393		1.36081	0.334063
6.87763	6.25738	6.41256	3.32181	9.13575	12.6618	9.06632	4.82217		-0.25911	1.38116	3.39182	-0.74824		1.06712	0.152324
2.39149	1.77183	5.27949	15.6551	1.62264	8.75418	6.8918	2.16869		0.183447	1.862	0.296208	1.62261		0.117369	1.03803
2.85234	3.3756	2.05947	5.8942	3.65149	5.90398	2.22367	5.83184		-0.04334	0.388802	-0.61778	-0.33725		0.089968	1.39235
2.94711	2.27414	2.52431	2.83503	2.6973	1.02173	5.39418	4.29716		-0.28614	5.10704	-0.35499	-0.23092		0.111985	0.643254
3.15045	2.24898	1.6909	12.6239	3.40271	2.19478	2.96465	2.28006		0.194798	0.133447	3.48028	1.24801		0.135417	0.156162
3.48161	3.81825	5.90226	3.1098	3.31008	2.70548	3.55095	2.29281		0.09669	-0.47312	-0.18265	-0.35431		0.17539	0.268539
4.08785	3.91436	4.09686	4.82801	7.94331	3.52429	5.98101	2.63405		0.227606	0.178467	-0.41131	-0.53039		0.404372	-0.0785485
4.15548	5.09098	5.75086	4.95503	3.73404	2.27631	4.38587	3.33072		0.225125	-0.13838	-0.39039	-0.24934		0.113263	0.159584
4.20048	6.34728	4.13338	7.33807	3.91811	2.34933	7.2659	5.19182		0.511084	0.775318	-0.40039	-0.10978		0.162676	0.14212
6.31557	6.24876	5.51982	9.56321	8.41752	12.5393	5.85722	6.74651		-0.01058	0.732522	0.489667	-0.07201		0.367024	0.212095
1.54184	1.20627	0.981311	4.23601	3.22168	1.30396	0.965419	4.89385		-0.18894	2.88541	-0.65926	3.92373		0.0827521	1.37209
4.66542	5.97341	3.3969	12.4704	0.849677	1.52727	14.9164	8.06646		0.514786	1.98015	1.65107	-0.30208		0.106124	-0.227206
4.99552	3.40284	11.4186	11.7785	10.3992	2.90533	6.83384	7.46887							0.0892434	1.24619
														0.108524	0.439029
														0.171079	2.43284
														0.144976	0.00711978
														0.277911	0.696269
														0.780735	0.976844
														0.172928	2.68124
														0.237473	0.436186
														0.217674	1.01307
														0.163054	1.60435
														0.155206	0.613884
														0.140849	0.875273
														0.10349	-0.188926
														0.172752	0.929504
														0.117582	0.786937
														0.100111	0.578133
														0.112501	0.789453
														0.121811	0.62196
														0.169618	0.132604
														0.0163999	8.61654
														0.0466396	8.86118
														0.0755076	4.52223
														0.0158023	36.6803
														0.184802	0.681944
														0.0598669	2.88846
														0.0598565	1.80205
														0.123089	0.268057
														0.0625855	3.88304
														0.0661548	2.87391
														0.0676806	2.35768
														0.0265967	5.08145
														0.0728856	2.9947
														0.0640964	1.7226
														0.184748	0.062941
														0.127662	2.30373
														0.145577	0.936028
														0.0540115	1.96268
														0.0922633	1.43238
														0.050288	3.62607
														0.034231	3.99484
														0.131282	2.39109
														0.224325	1.61709
														0.0131812	8.82876
														0.12118	1.01053
														0.0615039	2.02815
														0.0479623	3.1455
														0.0591863	3.3581
														0.188102	0.702334
														0.187331	0.926838
														0.0401004	6.74726
														0.0159293	15.0579
														0.335325	0.169416
														0.026483	7.93664
														0.165709	0.39981
														0.149204	0.297215
														0.0887559	1.31051
														0.377237	0.345072
														0.12144	0.255466
														0.0282807	4.664
														0.145169	0.998887
														0.158038	0.137649
														0.12831	0.40665
														0.148323	0.171931
														0.089252	1.36735
														0.0384729	5.60453
														0.0350965	4.37064
														0.0986522	1.04071
														0.11293	0.726714
														0.154899	0.386771
														0.153526	1.09824
														0.303018	0.789946
														0.113661	1.2318
														0.193089	0.846181
														0.2578	0.145423
														0.142705	0.870532
														0.200352	0.613647
														0.479828	0.436972
														0.214187	0.845252
														0.38348	1.01772
														0.127857	0.500752
														0.141923	0.889718
														0.614485	0.970046
														0.161605	0.741685
														0.262904	0.772982
														0.287955	0.839853
														0.115052	0.664411
														0.123315	3.46922
														0.212241	0.741714
														0.278418	1.33386
														0.322034	0.710235
														0.331324	1.38708
														0.940307	0.575336
														0.100443	1.53696
														0.0883938	2.30622
														0.040759	4.77049
														0.0532022	2.85418
														0.190144	1.2323
														0.0380807	3.71761
														0.186802	1.02066
														0.293054	1.07699
														0.243908	0.788533
														0.273631	0.962994
														0.128836	0.262304
														0.316067	0.641758
														0.666018	0.890314
														0.324324	0.973308
														0.168656	-0.0739114
														0.424925	1.35768
														0.0776616	1.29243
														0.235638	0.542665
														0.112372	0.807341
														0.497059	0.429771
														0.132003	1.14952
														0.104458	1.0917
														0.145012	1.20583
														0.171063	0.358902
														0.1119	0.930449
														0.137597	1.07943
														0.148671	0.691099
														0.151221	0.321005
														0.128187	0.473746
														0.358746	0.296084
														0.335829	1.07104
														0.401716	0.267234
														0.168451	0.366502
														0.12611	0.970807
														0.118993	0.601879
														0.143721	1.41005
														0.189992	0.396379
														0.143614	-0.000329858
														0.167828	0.725278
														0.362021	0.571469
														0.195374	0.719996
														0.220237	0.996999
														0.12718	0.699531
														0.136924	1.24292
														0.12898	0.494958
														0.18435	0.909188
														0.224741	0.835921
														0.139868	0.834492
														0.297398	0.98324
														0.185032	0.566331
														0.162173	0.79798
														0.111396	1.66875
														0.113206	0.897862
														0.142942	1.28092
														0.213769	0.604147
														0.183899	1.13914
														0.167229	0.76438
														0.218487	0.287712
														0.439076	0.747874
														0.140439	-0.842923
														0.173349	0.603528
														0.233633	0.585335
														0.17853	1.32547
														0.105567	1.29282
														0.212525	0.404788
														0.189052	1.60724
														0.121632	0.878883
														0.102479	0.301334
														0.307192	0.184541
														0.17803	0.31976
														0.22194	1.08767
														0.13824	1.01916
														0.350744	0.551962
														0.105977	0.0954839
														0.0682458	1.82943
														0.113516	0.216206
														0.197443	0.562146
														0.116133	1.99163
														-0.00330713	-67.7335
														0.197681	1.15397
														0.198636	1.56323
														0.420829	0.532681
														0.21094	1.16283
														0.43907	0.410119
														0.0495671	2.62795
														0.138034	0.12716
														0.0387488	2.87097
														0.109454	1.09963
														0.0916278	1.36619
														0.144979	1.25237
														0.141741	0.941586
														0.115123	1.13242
														0.111602	0.621491
														0.0820267	1.22746
														0.131203	0.234962
														0.188082	0.94314
														0.109959	1.70056
														0.116738	0.983711
														0.107866	0.556001
														0.15289	0.402748
														0.10276	0.534384
