# Supplementary material for: A cellular mechanism for inverse effectiveness in multisensory integration
Source: eLife. 2017 Mar 18;6:e25392. doi: 10.7554/eLife.25392 (PMC5375642; doi:10.7554/eLife.25392)
Supplement: Figure 2—source data 1. — Excel sheet contains raw data points used to generate figure. DOI: http://dx.doi.org/10.7554/eLife.25392.005 [file elife-25392-fig2-data1.xlsx]

## Sheet: figure 2
Panel A			Panel B
Max unsensory	MSIn		Max unsensory	MSIn
0.39	2.2		0.85	2.2
1.2	0.24		8.4	1.3
3	0.92		5.7	0.54
4.5	-0.12		0.3	2.3
3.5	0.071		2.8	0.69
4	0.38		0.94	3
1.5	0.62		2	1.3
2.4	0.38		4.4	1
1.3	2.9		5.3	1.8
4.8	0.25		4.6	0.25
1.6	0.37		4.1	2.3
2.8	0.24		0.67	1.6
2.2	0.51		7.2	1.1
1.2	-0.19		2.2	3.9
3.7	-0.37		0.12	5.2
2.7	0.21		1.2	3.2
4.5	0.1		0.97	1.3
3.4	0.39		1.7	1.9
1.6	0.53		2.1	2.9
0.97	0.29		5.9	1.6
1	0.94		3	1.1
0.91	0.38		3.2	2.7
1.7	1.7
3	-0.17
2.7	0.77
5.5	0.62
0.91	1.5
3.6	0.28
3.9	0.45
2.4	1.3
1.2	1.3
3.5	-0.06
2.6	0.035
1.3	0.18
3.5	0.13
2.1	0.43
3.8	0.19
1.5	1.1
1.6	0.53
0.97	0.37
