# Supplementary material for: A cellular mechanism for inverse effectiveness in multisensory integration
Source: eLife. 2017 Mar 18;6:e25392. doi: 10.7554/eLife.25392 (PMC5375642; doi:10.7554/eLife.25392)
Supplement: Figure 3—source data 1. — Excel sheet contains individual data points used to generate figure, organized by panel. DOI: http://dx.doi.org/10.7554/eLife.25392.007 [file elife-25392-fig3-data1.xlsx]

## Sheet: figure 3
Panel B			Panel D			Panel E					Panel G					Panel H
SupraT	SubT		SubT	+APV		Control		APV			Control		APV			High Saliency	Low Saliency	+MK-801
-0.0188141	0.688391		0.688391	3.68575		linear sum	combined response	linear sum	combined response		linear sum	combined response	linear sum	combined response		1.8617	0.944412	-0.961906
0.161577	2.38539		2.38539	0.638543		27.5675	14.8884	4.6187	10.8642		2.2	7.4	2.15385	3.38462		-2.20887	0.944412	0.156091
0.179882	6.94984		6.94984	0.00279334		24.7933	26.2168	6.90898	6.53351		1.58333	2.30769	1.08333	1.84615		1.8617	-1.29158	-0.961906
0.0403543	5.84096		5.84096	-0.252719		60.5681	37.2367	24.7003	13.4623		0.818182	5.33333	4	3.33333		-6.9388	0.944412	-1.75023
0.268123	7.74376		7.74376	1.70713		33.7228	17.7301	21.2692	10.8642		1.11111	8.2	4.63636	3.25		0.944412	0.944412	-1.95094
0.130761	2.41383		2.41383	0.0758824		48.6131	33.8485	4.6885	8.46586		7.45455	9.16667	5.625	3.75		-4.44487	0.944412	2.19138
-0.048884				2.93941		32.4765	19.0233	11.8214	7.3357		4.2	6.45455	2.14286	2.14286		-2.20887	0.944412	-1.62126
0.262438				0.228777		41.59	22.3608	4.59358	11.8317		4.25	6.6	0.636364	1.08333		0.944412	0.944412	-0.0446168
0.0609327				0.307089		57.3978	37.6935	3.19118	2.8826		1.63636	2.72727	2.6	2.2		-1.29158	0.28506	-0.374293
0.0586461				1.77871		48.7722	44.257	18.1298	16.7389		8.875	9.375	1.77778	1.22222		2.52105	0.28506	1.8617
						40.5913	22.252	4.20567	6.42835		2.90909	4.41667	1.49091	1.09091		-0.63223	0.944412	1.53203
						11.283	18.6444				2.83333	4.75	1.46364	1		-0.63223	1.8617	0.414028
						11.0987	19.618				8.2	9.54545				-0.63223	-0.374293	-0.0446168
						8.66032	35.2062				11.7273	9.7				0.944412	1.8617	3.10867
						7.6038	35.2211				8.96	6.70833				-2.20887	3.43834	3.43834
						7.20894	38.0586				13.6667	8.25				-1.29158		-0.374293
						11.5415	19.7425				8.33333	5.625				2.52105
											13.5	9.5				0.944412
											8.1	4.83333				-3.52758
											17.0833	7.75				0.28506
											8.44697	5.15385				0.944412
											5.71429	3.875				-3.78551
											3.33333	3.14286				-2.20887
											15.6667	9.91667
											29.8333	22.6154
											21.3636	23.7273
											17.5	17
											20	8.86667
											15.6364	6
											7.90909	6.45455
